# Supplementary material
Source: PubMed Central journal article supplement (PMC7704908)

**Figure S1**  
Myeloid Cells Respond to Br-mets, Related to Figure 1

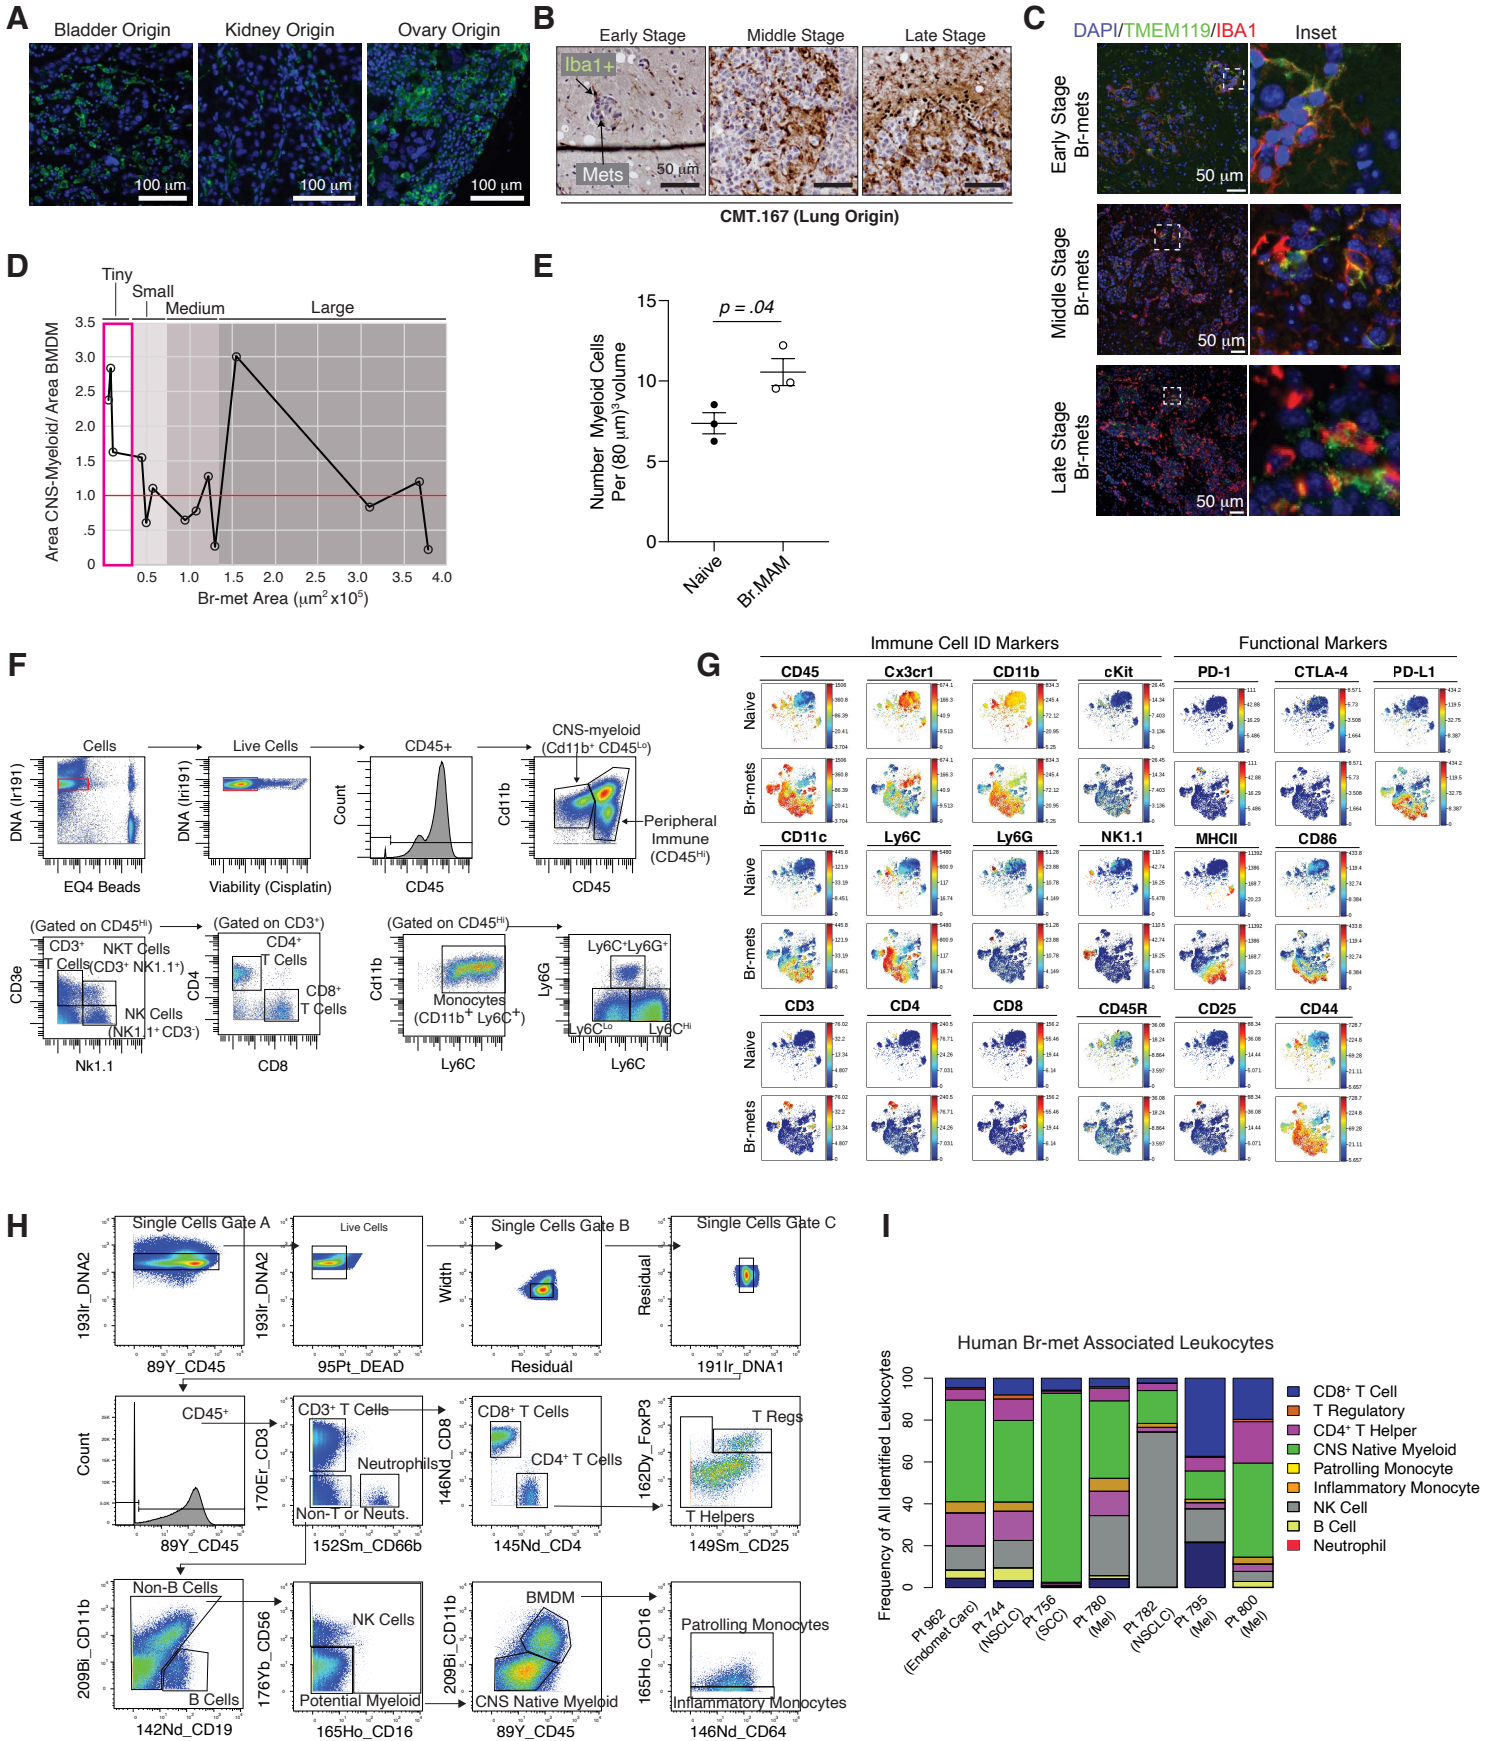

Supplement: NIHMS1634321-supplement-1.pdf [file NIHMS1634321-supplement-1.pdf]

**Figure S2**

CITE-seq Antibody-based Gating Strategy and DAM Gene Signature, Related to Figure 2

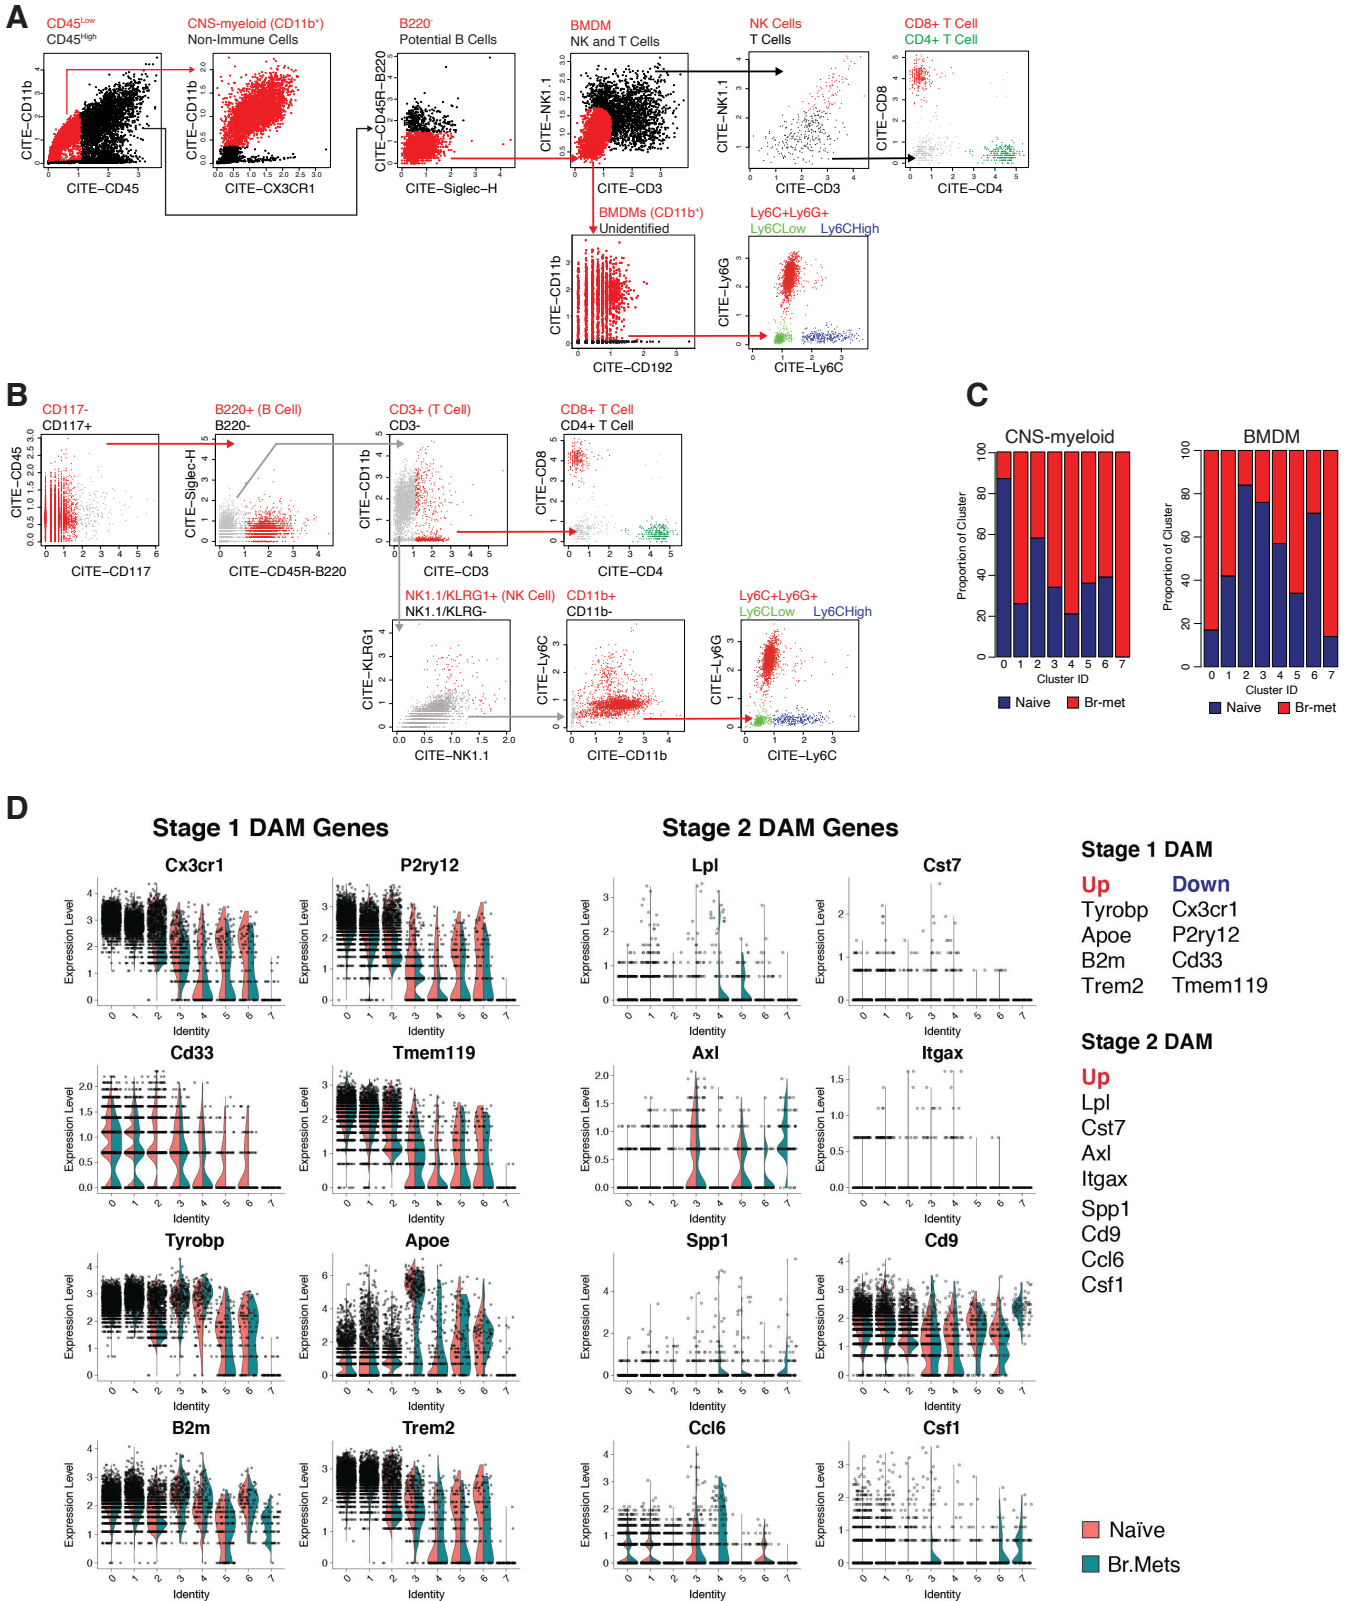

Supplement: NIHMS1634321-supplement-2.pdf [file NIHMS1634321-supplement-2.pdf]

**Figure S3**

BMDM are Heterogeneous and Distinct from their Naive Counterparts, Related to Figure 2

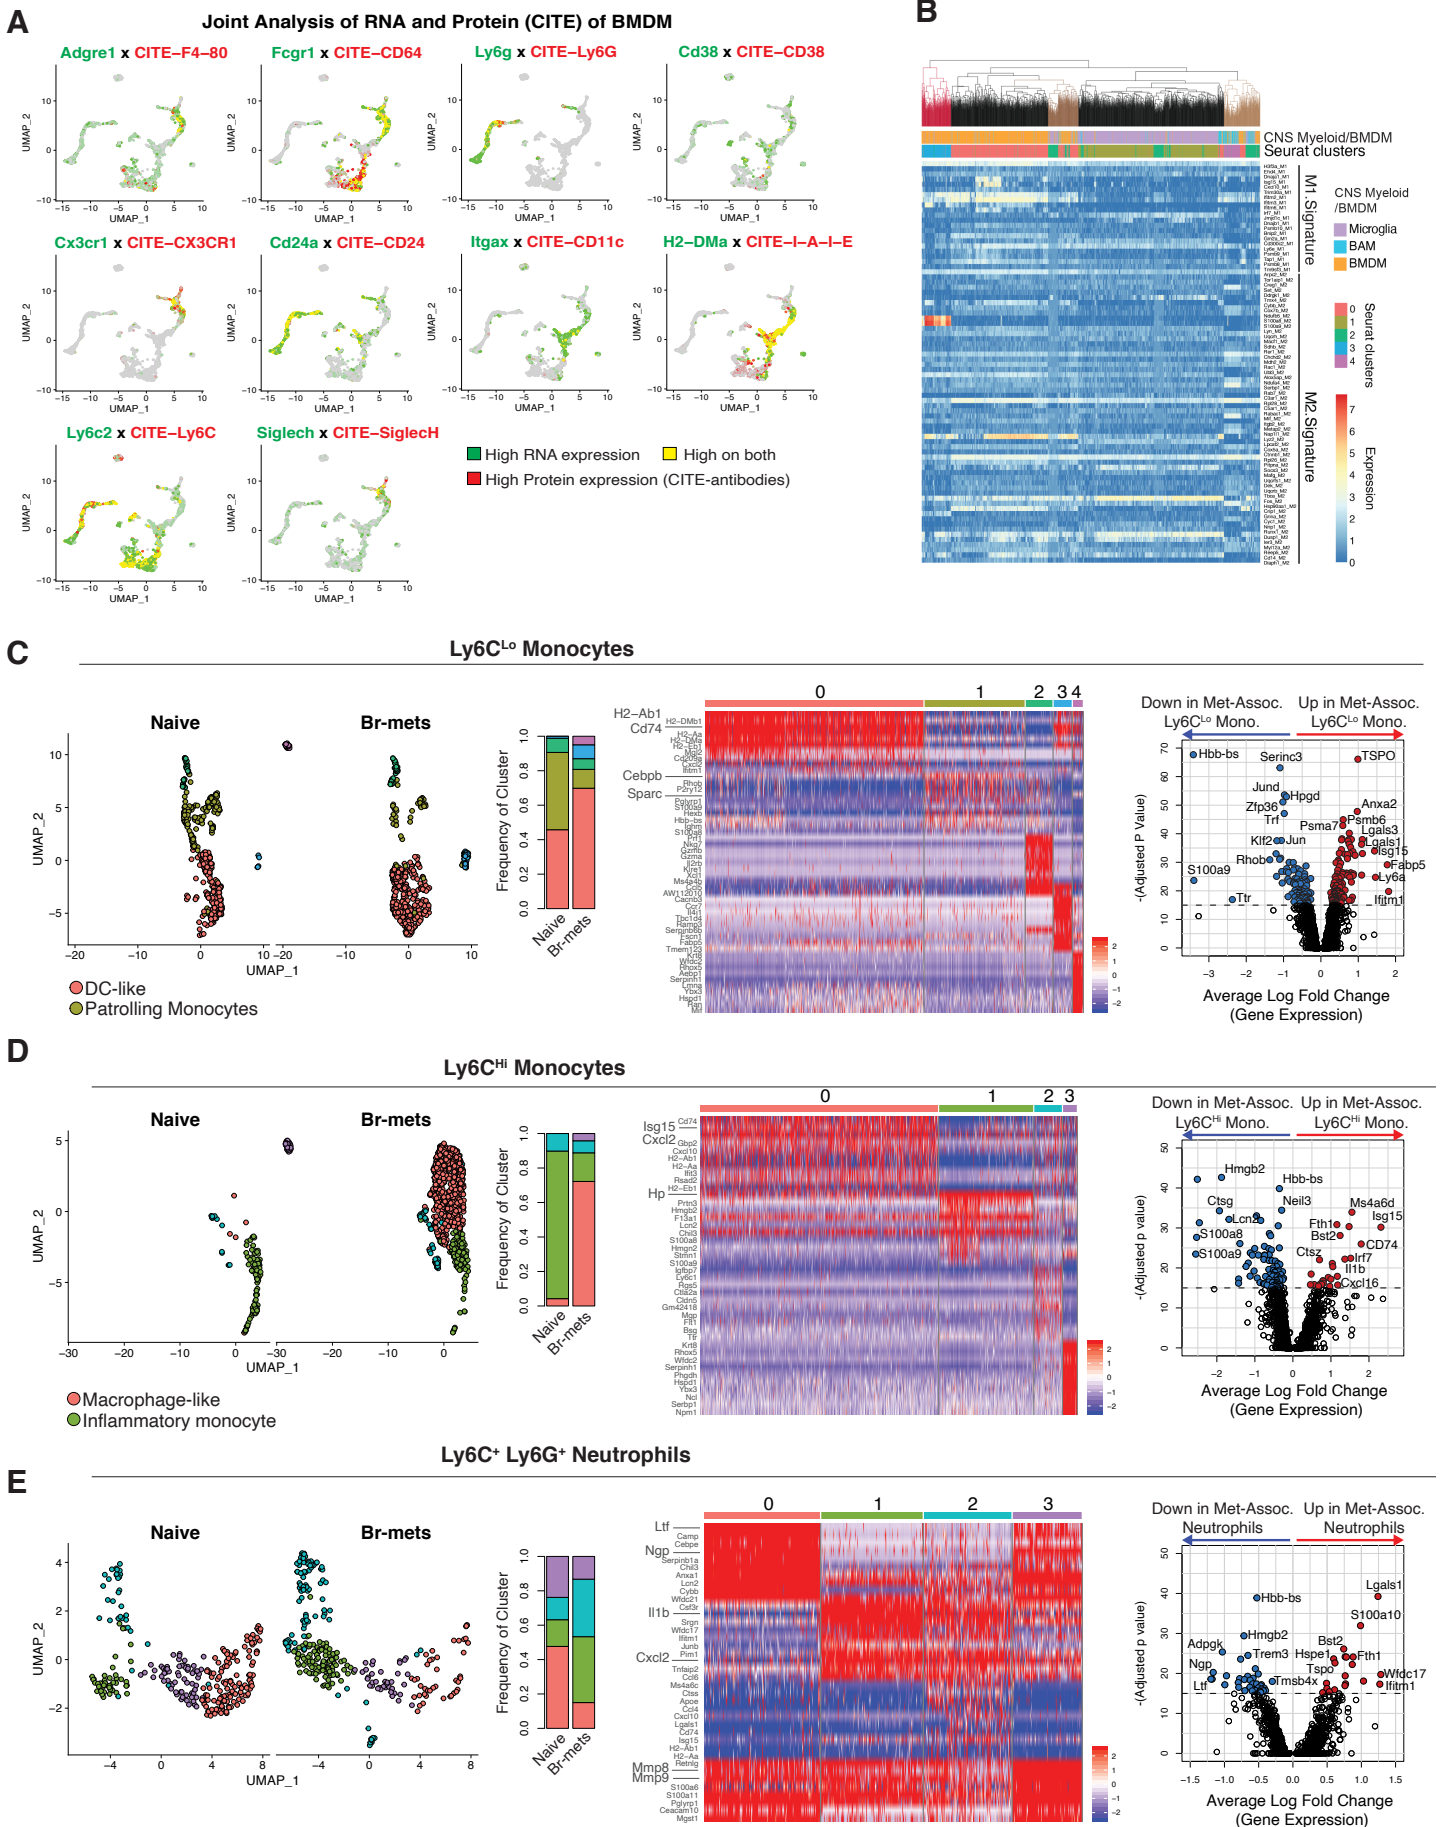

Supplement: NIHMS1634321-supplement-3.pdf [file NIHMS1634321-supplement-3.pdf]

# Figure S4

Cx3cr1 Expression Among Leukocytes, Related to Figure 5

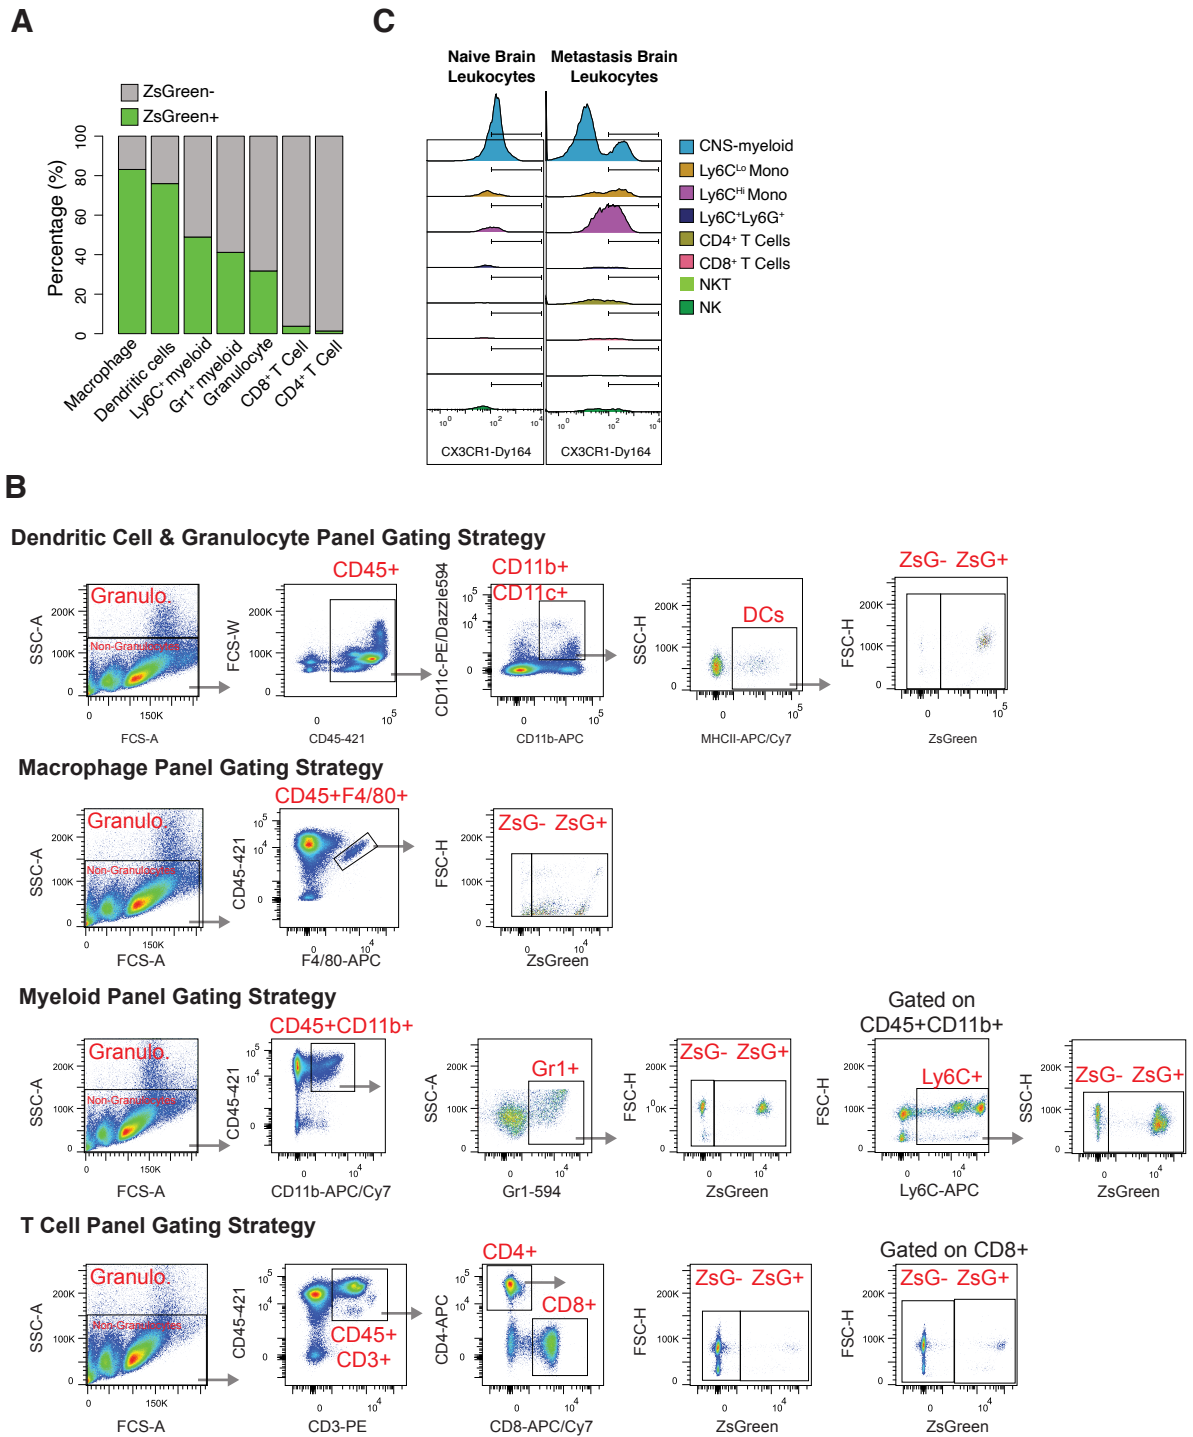

Supplement: NIHMS1634321-supplement-4.pdf [file NIHMS1634321-supplement-4.pdf]

**Figure S5**

General Myeloid and CNS-myeloid Depletion Reduces Br-met, Related to Figure 5

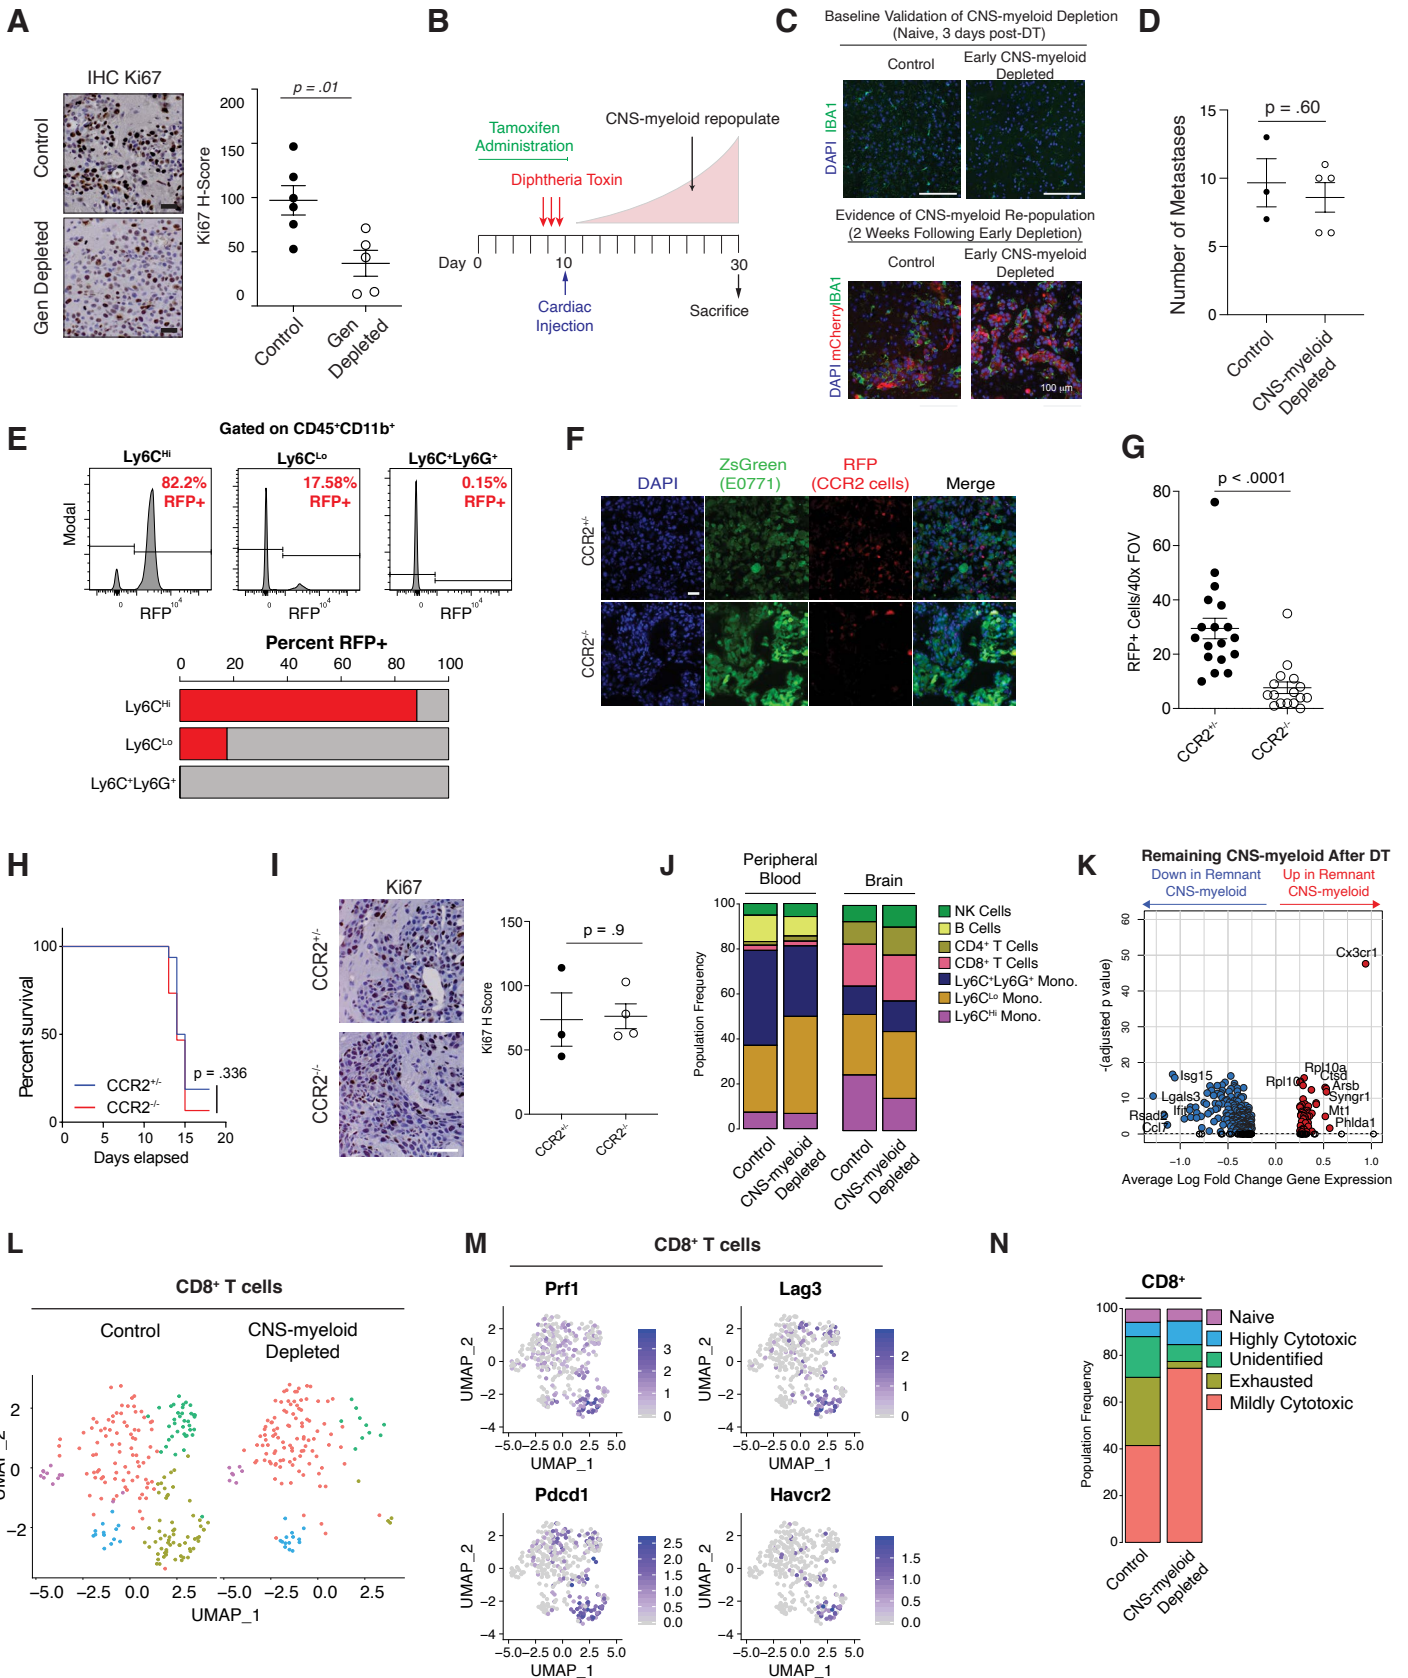

Supplement: NIHMS1634321-supplement-5.pdf [file NIHMS1634321-supplement-5.pdf]

# Figure S6

Cx3cr1 KO Promotes CNS-myeloid Interferon Response, Related to Figure 6

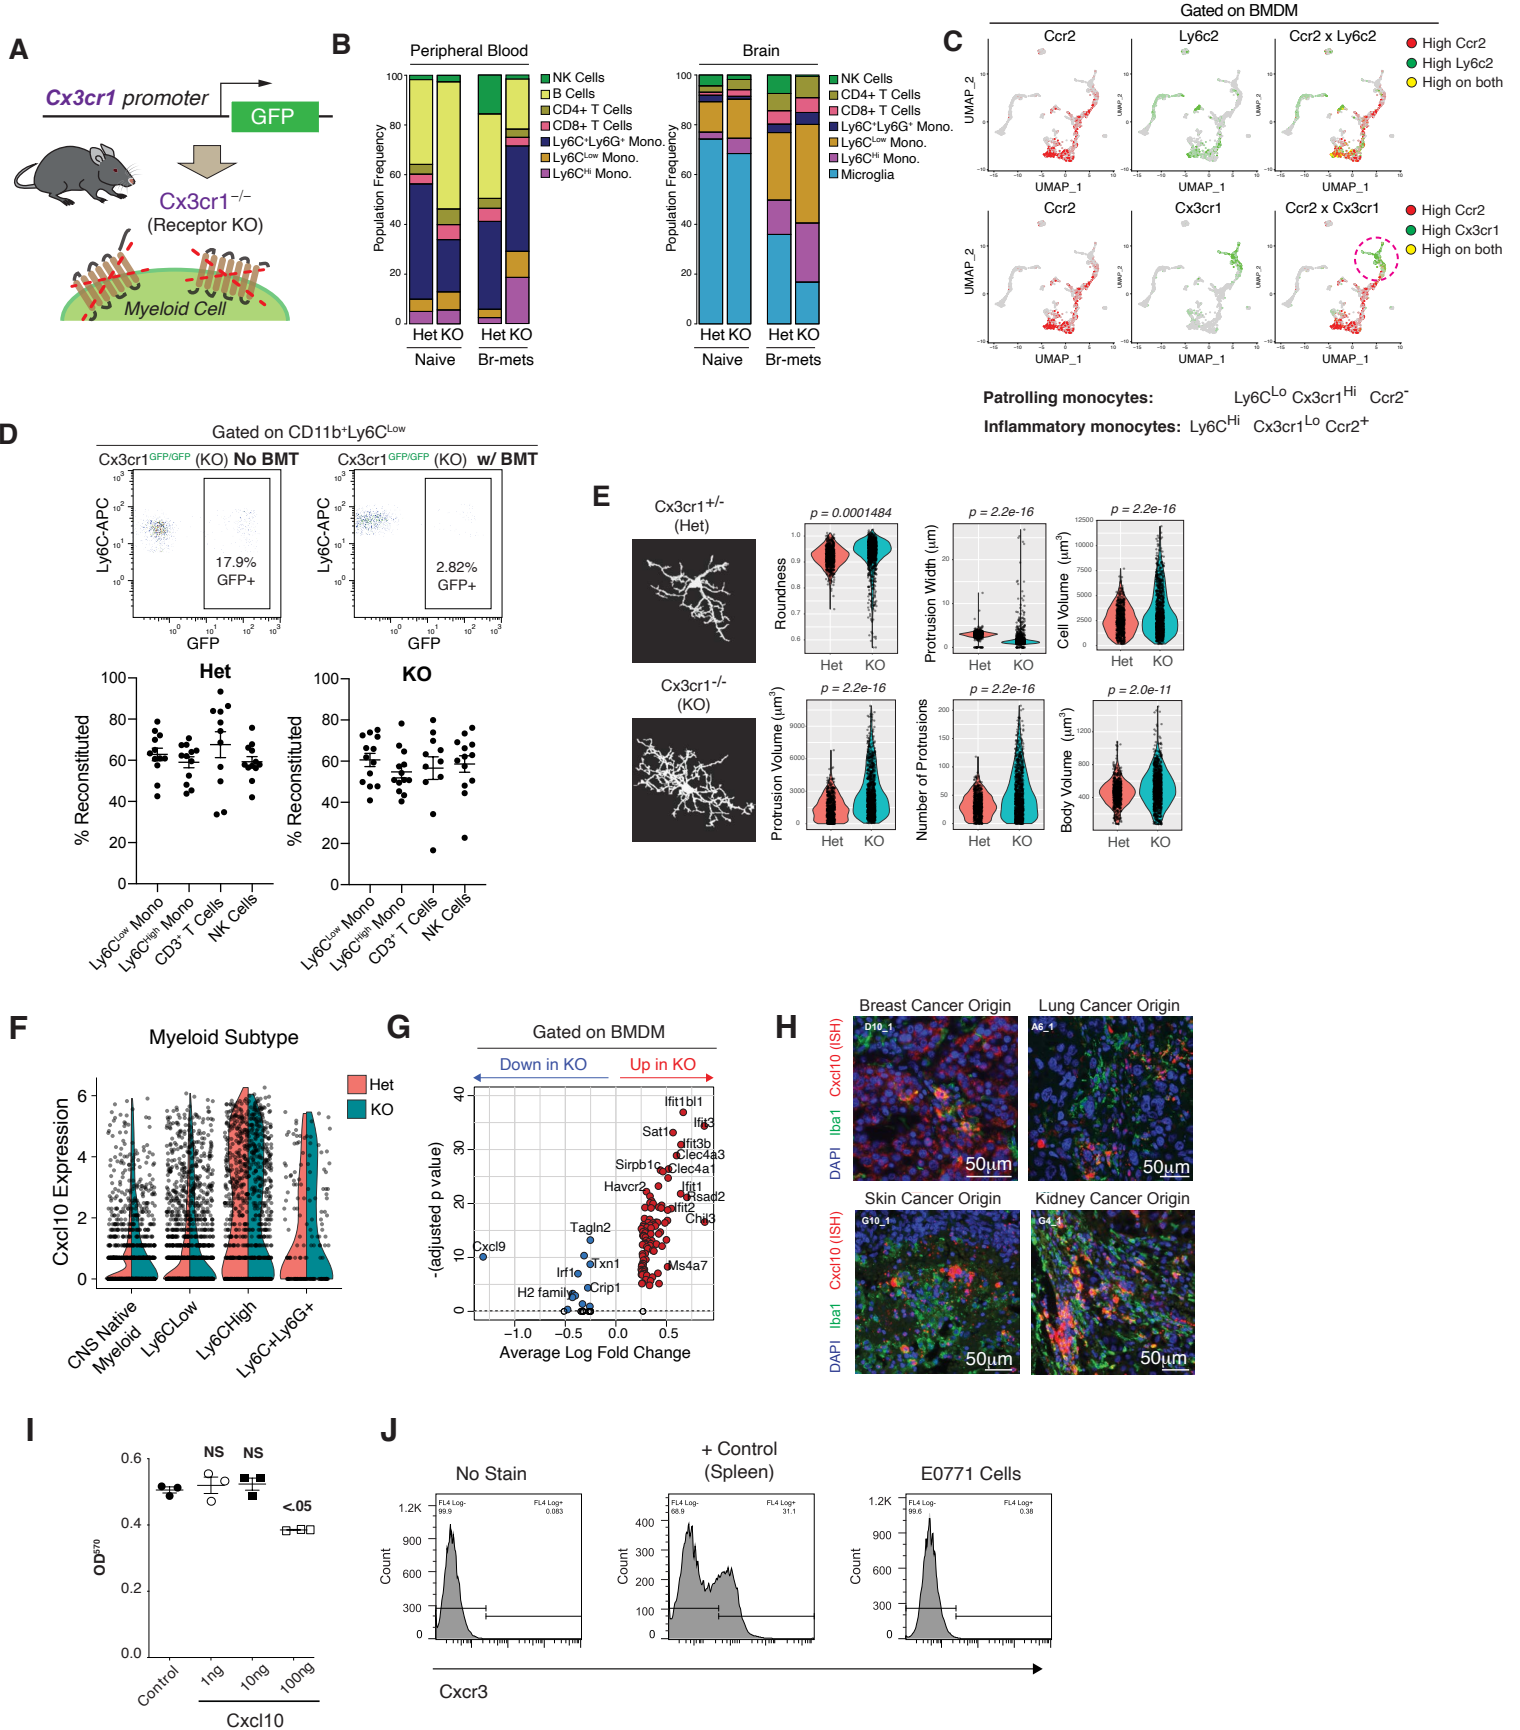

Supplement: NIHMS1634321-supplement-6.pdf [file NIHMS1634321-supplement-6.pdf]

**Figure S7**

Immune Checkpoint Expression in the Br-met Niche, Related to Figure 7

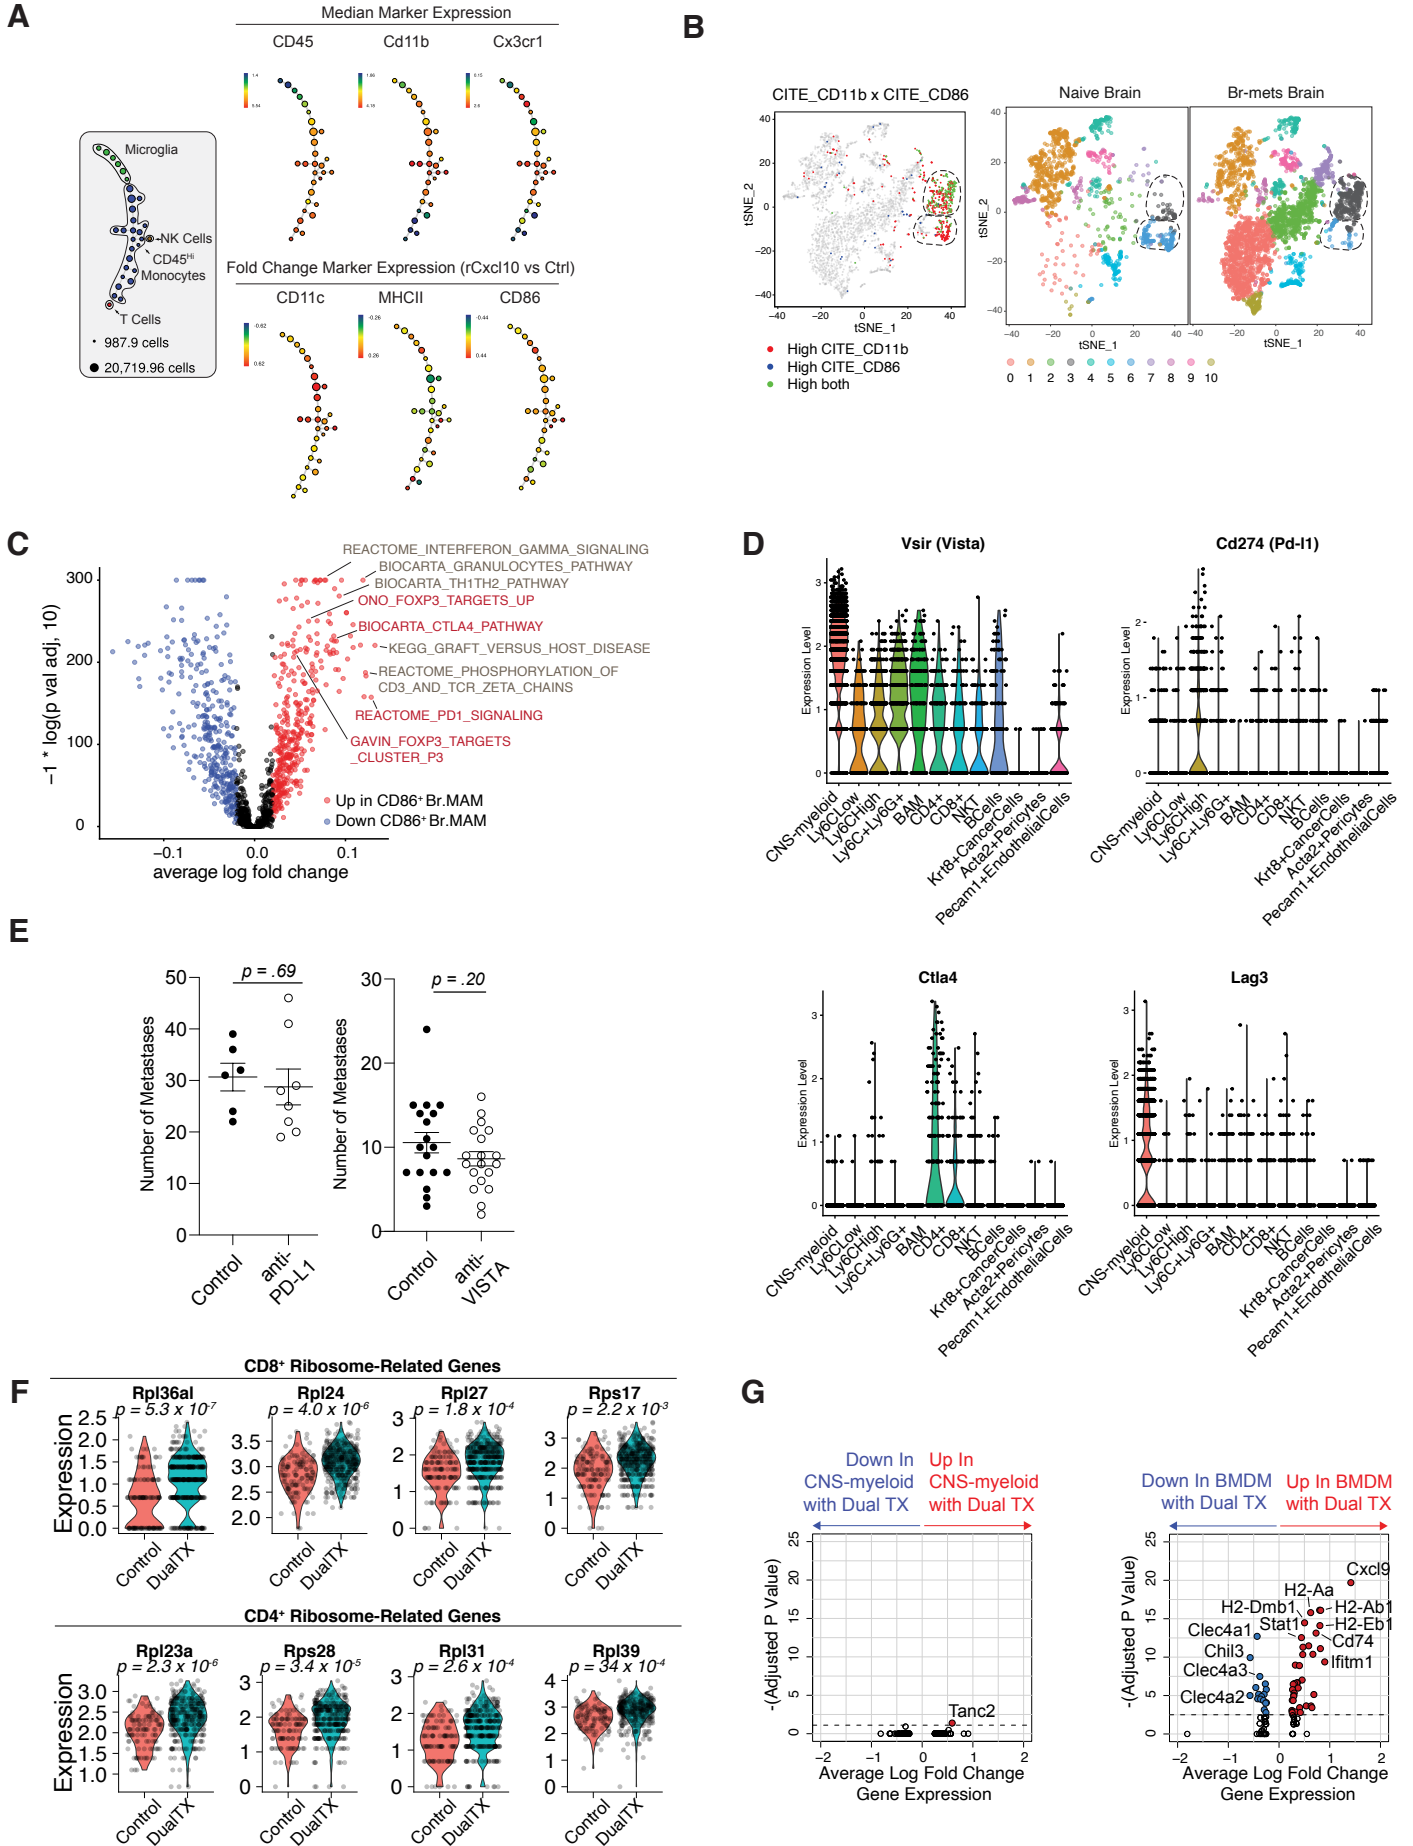

Supplement: NIHMS1634321-supplement-7.pdf [file NIHMS1634321-supplement-7.pdf]
